# Supplementary material for: Irrigation Optimization via Crop Water Use in Saline Coastal Areas—A Field Data Analysis in China’s Yellow River Delta
Source: MDPI journal article supplement (doi:10.3390/plants12101990), 2023-05-15
Supplement: s1 [file s1]

Supplementary materials

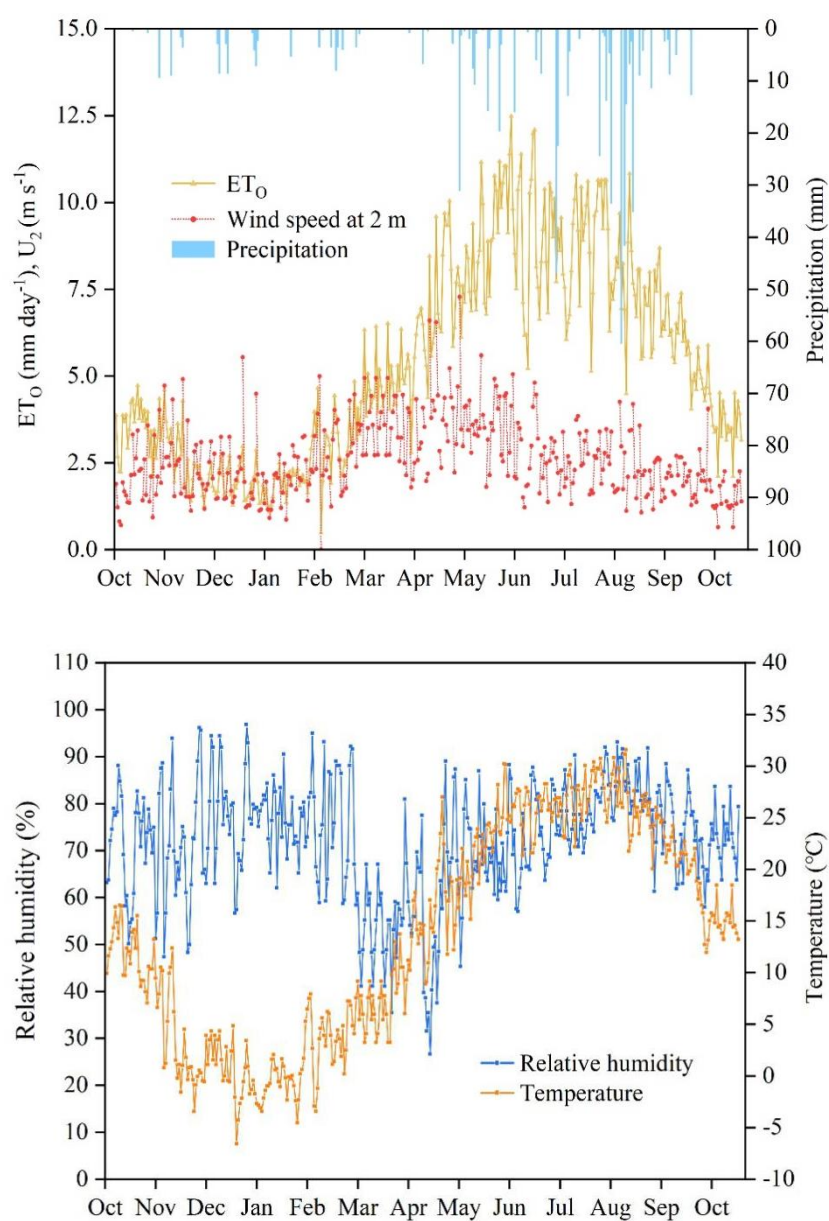

**Figure S1.** Plots of daily meteorological data for the from October 2019 to October 2020.

**Table S1.** Goodness-of-fit test indicators of the HYDRUS-1D model calibration and validation for the Yellow River Delta study area.

| Period      | Crop    | R <sup>2</sup> | RMSE (cm <sup>3</sup> cm <sup>-3</sup> ) | NSE  |
|-------------|---------|----------------|------------------------------------------|------|
| Calibration | Wheat   | 0.98           | 0.012                                    | 0.98 |
|             | Soybean | 0.99           | 0.005                                    | 0.99 |
|             | Maize   | 0.88           | 0.022                                    | 0.82 |
|             | Sorghum | 0.97           | 0.014                                    | 0.97 |
| Validation  | Wheat   | 0.60           | 0.052                                    | 0.46 |
|             | Soybean | 0.99           | 0.012                                    | 0.98 |
|             | Maize   | 0.98           | 0.016                                    | 0.96 |
|             | Sorghum | 0.92           | 0.026                                    | 0.92 |

R<sup>2</sup>, RMSE and NSE are the coefficient of determination, Nash–Sutcliffe efficiency coefficient and root mean square error, respectively.

**Table S2.** Calibrated soil hydraulic parameters of van-Genuchten equation in HYDRUS-1D.

| Crops   | Soil depths | Hydraulic parameters in the van Genuchten model |                                                |                              |      |                                      |
|---------|-------------|-------------------------------------------------|------------------------------------------------|------------------------------|------|--------------------------------------|
|         |             | $\theta_r$ (cm <sup>3</sup> cm <sup>-3</sup> )  | $\theta_s$ (cm <sup>3</sup> cm <sup>-3</sup> ) | $\alpha$ (cm <sup>-1</sup> ) | n    | K <sub>s</sub> (cm d <sup>-1</sup> ) |
| Wheat   | 0-40 cm     | 0.025                                           | 0.517                                          | 0.007                        | 1.35 | 59.3                                 |
|         | 40-60 cm    | 0.040                                           | 0.551                                          | 0.006                        | 1.49 | 37.7                                 |
| Maize   | 0-40 cm     | 0.102                                           | 0.408                                          | 0.093                        | 2.26 | 31.8                                 |
|         | 40-60 cm    | 0.107                                           | 0.408                                          | 0.105                        | 1.98 | 73.2                                 |
| Soybean | 0-40cm      | 0.106                                           | 0.378                                          | 0.074                        | 1.44 | 24.9                                 |
|         | 40-60 cm    | 0.106                                           | 0.419                                          | 0.073                        | 2.37 | 70.5                                 |
| Sorghum | 0-40 cm     | 0.109                                           | 0.345                                          | 0.028                        | 1.24 | 24.1                                 |
|         | 40-60 cm    | 0.106                                           | 0.477                                          | 0.021                        | 5.93 | 25.3                                 |

**Table S3.** The FAO-56 recommended average crop coefficient (K<sub>C-FAO</sub>) and length of crop development stage (LCS) for winter wheat, and summer maize, soybean and sorghum in the Yellow River Delta study area.

<sup>a</sup> K<sub>C-FAO</sub> values are the crop coefficients of initial/mid-season/late-season given by FAO.

| Crop    | K <sub>C-FAO</sub> <sup>a</sup> | LCS (days) <sup>b</sup> |
|---------|---------------------------------|-------------------------|
| Wheat   | 0.70/1.15/0.25                  | 30/40/30                |
| Maize   | 0.30/1.20/0.35                  | 20/40/30                |
| Soybean | 0.50/1.15/0.50                  | 20/60/25                |
| Sorghum | 0.30/1.20/1.05                  | 20/40/30                |

<sup>b</sup> LCS is the number of days of initial/mid-season/late-season stages. The values of wheat, and summer maize, soybean and sorghum are respectively from Central USA, Nigeria and USA.

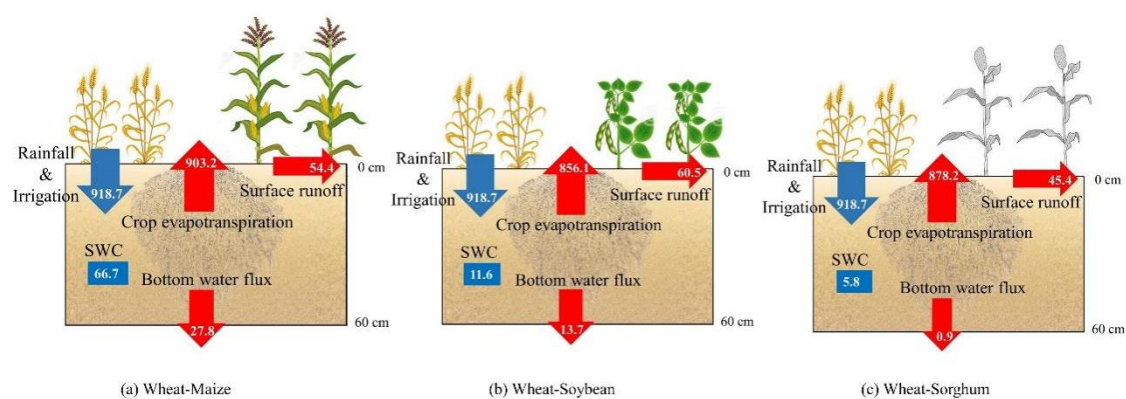

**Figure S2.** Water budget for wheat-maize, wheat-soybean and wheat-sorghum rotations in the Yellow River Delta study area. Note that SWC refers to change in soil water content [mm]; red denotes water loss and blue water gain. Rainfall, irrigation and surface runoff were obtained by in-site observations; Evapotranspiration was obtained by Penman–Monteith equation based on climate data; Bottom water flux was obtained by the simulations from HYDUS-1D model; SWC was then calculated by water balance equation.
